# Supplementary material
Source: PubMed Central journal article supplement (PMC6135234)
Supplement: NIHMS79344-supplement-Supplementary_Data.pdf [file NIHMS79344-supplement-Supplementary_Data.pdf]

LDL

| LDL        | rs267733    | rs2710642   | rs10490626  | rs2030746   | rs1250229   | rs7640978   | rs17404153 | rs4530754 | rs4722551 | rs10102164 | rs4942486 | rs1801689 | rs364585 | rs2328223   | rs5763662 | rs2479409 | rs629301 | rs1367117   | rs4299376 | rs3757354   | rs1800562 | rs1564348   | rs11136341  | rs11220462 | rs8017377 | rs7206971 | rs6511720 | rs4420638   | rs6029526 |   |
|------------|-------------|-------------|-------------|-------------|-------------|-------------|------------|-----------|-----------|------------|-----------|-----------|----------|-------------|-----------|-----------|----------|-------------|-----------|-------------|-----------|-------------|-------------|------------|-----------|-----------|-----------|-------------|-----------|---|
| rs267733   | 1           |             |             |             |             |             |            |           |           |            |           |           |          |             |           |           |          |             |           |             |           |             |             |            |           |           |           |             |           |   |
| rs2710642  | 0           | 1           |             |             |             |             |            |           |           |            |           |           |          |             |           |           |          |             |           |             |           |             |             |            |           |           |           |             |           |   |
| rs10490626 | 0           | 0.00017589  | 1           |             |             |             |            |           |           |            |           |           |          |             |           |           |          |             |           |             |           |             |             |            |           |           |           |             |           |   |
| rs2030746  | 0           | 0.000261646 | 0.00074418  | 1           |             |             |            |           |           |            |           |           |          |             |           |           |          |             |           |             |           |             |             |            |           |           |           |             |           |   |
| rs1250229  | 0           | 2.28934E-05 | 4.84996E-06 | 4.31989E-05 | 1           |             |            |           |           |            |           |           |          |             |           |           |          |             |           |             |           |             |             |            |           |           |           |             |           |   |
| rs7640978  | 0           | 0           | 0           | 0           | 0           | 1           |            |           |           |            |           |           |          |             |           |           |          |             |           |             |           |             |             |            |           |           |           |             |           |   |
| rs17404153 | 0           | 0           | 0           | 0           | 0           | 0.000353185 | 1          |           |           |            |           |           |          |             |           |           |          |             |           |             |           |             |             |            |           |           |           |             |           |   |
| rs4530754  | 0           | 0           | 0           | 0           | 0           | 0           | 0          | 1         |           |            |           |           |          |             |           |           |          |             |           |             |           |             |             |            |           |           |           |             |           |   |
| rs4722551  | 0           | 0           | 0           | 0           | 0           | 0           | 0          | 0         | 1         |            |           |           |          |             |           |           |          |             |           |             |           |             |             |            |           |           |           |             |           |   |
| rs10102164 | 0           | 0           | 0           | 0           | 0           | 0           | 0          | 0         | 0         | 1          |           |           |          |             |           |           |          |             |           |             |           |             |             |            |           |           |           |             |           |   |
| rs4942486  | 0           | 0           | 0           | 0           | 0           | 0           | 0          | 0         | 0         | 0          | 1         |           |          |             |           |           |          |             |           |             |           |             |             |            |           |           |           |             |           |   |
| rs1801689  | 0           | 0           | 0           | 0           | 0           | 0           | 0          | 0         | 0         | 0          | 0         | 1         |          |             |           |           |          |             |           |             |           |             |             |            |           |           |           |             |           |   |
| rs364585   | 0           | 0           | 0           | 0           | 0           | 0           | 0          | 0         | 0         | 0          | 0         | 0         | 1        |             |           |           |          |             |           |             |           |             |             |            |           |           |           |             |           |   |
| rs2328223  | 0           | 0           | 0           | 0           | 0           | 0           | 0          | 0         | 0         | 0          | 0         | 0         | 0        | 5.05832E-05 | 1         |           |          |             |           |             |           |             |             |            |           |           |           |             |           |   |
| rs5763662  | 0           | 0           | 0           | 0           | 0           | 0           | 0          | 0         | 0         | 0          | 0         | 0         | 0        | 0           | 0         | 1         |          |             |           |             |           |             |             |            |           |           |           |             |           |   |
| rs2479409  | 0.000206081 | 0           | 0           | 0           | 0           | 0           | 0          | 0         | 0         | 0          | 0         | 0         | 0        | 0           | 0         | 0         | 1        |             |           |             |           |             |             |            |           |           |           |             |           |   |
| rs629301   | 3.89766E-05 | 0           | 0           | 0           | 0           | 0           | 0          | 0         | 0         | 0          | 0         | 0         | 0        | 0           | 0         | 0         | 0        | 3.90979E-06 | 1         |             |           |             |             |            |           |           |           |             |           |   |
| rs1367117  | 0           | 2.41168E-06 | 0.0011282   | 0.000147336 | 1.51624E-05 | 0           | 0          | 0         | 0         | 0          | 0         | 0         | 0        | 0           | 0         | 0         | 0        | 0           | 0         | 1           |           |             |             |            |           |           |           |             |           |   |
| rs4299376  | 0           | 2.84951E-05 | 0.000225776 | 3.07608E-07 | 0.00031108  | 0           | 0          | 0         | 0         | 0          | 0         | 0         | 0        | 0           | 0         | 0         | 0        | 0           | 0         | 9.78638E-06 | 1         |             |             |            |           |           |           |             |           |   |
| rs3757354  | 0           | 0           | 0           | 0           | 0           | 0           | 0          | 0         | 0         | 0          | 0         | 0         | 0        | 0           | 0         | 0         | 0        | 0           | 0         | 0           | 1         |             |             |            |           |           |           |             |           |   |
| rs1800562  | 0           | 0           | 0           | 0           | 0           | 0           | 0          | 0         | 0         | 0          | 0         | 0         | 0        | 0           | 0         | 0         | 0        | 0           | 0         | 0           | 0         | 0.000140851 | 1           |            |           |           |           |             |           |   |
| rs1564348  | 0           | 0           | 0           | 0           | 0           | 0           | 0          | 0         | 0         | 0          | 0         | 0         | 0        | 0           | 0         | 0         | 0        | 0           | 0         | 0           | 0         | 6.82481E-06 | 0.000130239 | 1          |           |           |           |             |           |   |
| rs11136341 | 0           | 0           | 0           | 0           | 0           | 0           | 0          | 0         | 0         | 0          | 0         | 0         | 0        | 0           | 0         | 0         | 0        | 0           | 0         | 0           | 0         | 0           | 0           | 0          | 1         |           |           |             |           |   |
| rs11220462 | 0           | 0           | 0           | 0           | 0           | 0           | 0          | 0         | 0         | 0          | 0         | 0         | 0        | 0           | 0         | 0         | 0        | 0           | 0         | 0           | 0         | 0           | 0           | 0          | 0         | 1         |           |             |           |   |
| rs8017377  | 0           | 0           | 0           | 0           | 0           | 0           | 0          | 0         | 0         | 0          | 0         | 0         | 0        | 0           | 0         | 0         | 0        | 0           | 0         | 0           | 0         | 0           | 0           | 0          | 0         | 0         | 1         |             |           |   |
| rs7206971  | 0           | 0           | 0           | 0           | 0           | 0           | 0          | 0         | 0         | 0          | 0         | 0         | 0        | 0           | 0         | 0         | 0        | 0           | 0         | 0           | 0         | 0           | 0           | 0          | 0         | 0         | 0         | 1           |           |   |
| rs6511720  | 0           | 0           | 0           | 0           | 0           | 0           | 0          | 0         | 0         | 0          | 0         | 0         | 0        | 0           | 0         | 0         | 0        | 0           | 0         | 0           | 0         | 0           | 0           | 0          | 0         | 0         | 0         | 0           | 1         |   |
| rs4420638  | 0           | 0           | 0           | 0           | 0           | 0           | 0          | 0         | 0         | 0          | 0         | 0         | 0        | 0           | 0         | 0         | 0        | 0           | 0         | 0           | 0         | 0           | 0           | 0          | 0         | 0         | 0         | 2.34547E-05 | 1         |   |
| rs6029526  | 0           | 0           | 0           | 0           | 0           | 0           | 0          | 0         | 0         | 0          | 0         | 0         | 0        | 0           | 0         | 0         | 0        | 0           | 0         | 0           | 0         | 0           | 0           | 0          | 0         | 0         | 0         | 0           | 0         | 1 |

TG

| TG         | rs6831256   | rs998584 | rs38855     | rs1832007   | rs3198697   | rs8077889 | rs7248104   | rs731839 | rs2131925 | rs1260326 | rs645040 | rs442177 | rs9686661 | rs17145738 | rs11776767 | rs1495741   | rs12678919  | rs2954029   | rs10761731 | rs2068888   | rs174546 | rs964184    | rs11613352 | rs2929282 | rs11649653 | rs5756931 |
|------------|-------------|----------|-------------|-------------|-------------|-----------|-------------|----------|-----------|-----------|----------|----------|-----------|------------|------------|-------------|-------------|-------------|------------|-------------|----------|-------------|------------|-----------|------------|-----------|
| rs6831256  | 1           |          |             |             |             |           |             |          |           |           |          |          |           |            |            |             |             |             |            |             |          |             |            |           |            |           |
| rs998584   | 0           | 1        |             |             |             |           |             |          |           |           |          |          |           |            |            |             |             |             |            |             |          |             |            |           |            |           |
| rs38855    | 0           | 0        | 1           |             |             |           |             |          |           |           |          |          |           |            |            |             |             |             |            |             |          |             |            |           |            |           |
| rs1832007  | 0           | 0        | 0           | 1           |             |           |             |          |           |           |          |          |           |            |            |             |             |             |            |             |          |             |            |           |            |           |
| rs3198697  | 0           | 0        | 0           | 0           | 1           |           |             |          |           |           |          |          |           |            |            |             |             |             |            |             |          |             |            |           |            |           |
| rs8077889  | 0           | 0        | 0           | 0           | 0           | 1         |             |          |           |           |          |          |           |            |            |             |             |             |            |             |          |             |            |           |            |           |
| rs7248104  | 0           | 0        | 0           | 0           | 0           | 0         | 1           |          |           |           |          |          |           |            |            |             |             |             |            |             |          |             |            |           |            |           |
| rs731839   | 0           | 0        | 0           | 0           | 0           | 0         | 0.000578815 | 1        |           |           |          |          |           |            |            |             |             |             |            |             |          |             |            |           |            |           |
| rs2131925  | 0           | 0        | 0           | 0           | 0           | 0         | 0           | 0        | 1         |           |          |          |           |            |            |             |             |             |            |             |          |             |            |           |            |           |
| rs1260326  | 0           | 0        | 0           | 0           | 0           | 0         | 0           | 0        | 0         | 1         |          |          |           |            |            |             |             |             |            |             |          |             |            |           |            |           |
| rs645040   | 0           | 0        | 0           | 0           | 0           | 0         | 0           | 0        | 0         | 0         | 1        |          |           |            |            |             |             |             |            |             |          |             |            |           |            |           |
| rs442177   | 0.000653423 | 0        | 0           | 0           | 0           | 0         | 0           | 0        | 0         | 0         | 0        | 1        |           |            |            |             |             |             |            |             |          |             |            |           |            |           |
| rs9686661  | 0           | 0        | 0           | 0           | 0           | 0         | 0           | 0        | 0         | 0         | 0        | 0        | 1         |            |            |             |             |             |            |             |          |             |            |           |            |           |
| rs17145738 | 0           | 0        | 1.60669E-06 | 0           | 0           | 0         | 0           | 0        | 0         | 0         | 0        | 0        | 0         | 1          |            |             |             |             |            |             |          |             |            |           |            |           |
| rs11776767 | 0           | 0        | 0           | 0           | 0           | 0         | 0           | 0        | 0         | 0         | 0        | 0        | 0         | 0          | 1          |             |             |             |            |             |          |             |            |           |            |           |
| rs1495741  | 0           | 0        | 0           | 0           | 0           | 0         | 0           | 0        | 0         | 0         | 0        | 0        | 0         | 0          | 0          | 4.05999E-05 | 1           |             |            |             |          |             |            |           |            |           |
| rs12678919 | 0           | 0        | 0           | 0           | 0           | 0         | 0           | 0        | 0         | 0         | 0        | 0        | 0         | 0          | 0          | 9.54144E-09 | 0.000243832 |             |            |             |          |             |            |           |            |           |
| rs2954029  | 0           | 0        | 0           | 0           | 0           | 0         | 0           | 0        | 0         | 0         | 0        | 0        | 0         | 0          | 0          | 0.00140449  | 2.17529E-05 | 0.000312429 | 1          |             |          |             |            |           |            |           |
| rs10761731 | 0           | 0        | 0           | 0.0010517   | 0           | 0         | 0           | 0        | 0         | 0         | 0        | 0        | 0         | 0          | 0          | 0           | 0           | 0           | 0          | 0           | 1        |             |            |           |            |           |
| rs2068888  | 0           | 0        | 0           | 1.83591E-06 | 0           | 0         | 0           | 0        | 0         | 0         | 0        | 0        | 0         | 0          | 0          | 0           | 0           | 0           | 0          | 3.91866E-07 | 1        |             |            |           |            |           |
| rs174546   | 0           | 0        | 0           | 0           | 0           | 0         | 0           | 0        | 0         | 0         | 0        | 0        | 0         | 0          | 0          | 0           | 0           | 0           | 0          | 0           | 0        | 1           |            |           |            |           |
| rs964184   | 0           | 0        | 0           | 0           | 0           | 0         | 0           | 0        | 0         | 0         | 0        | 0        | 0         | 0          | 0          | 0           | 0           | 0           | 0          | 0           | 0        | 2.63277E-06 | 1          |           |            |           |
| rs11613352 | 0           | 0        | 0           | 0           | 0           | 0         | 0           | 0        | 0         | 0         | 0        | 0        | 0         | 0          | 0          | 0           | 0           | 0           | 0          | 0           | 0        | 0           | 0          | 1         |            |           |
| rs2412710  | 0           | 0        | 0           | 0           | 0           | 0         | 0           | 0        | 0         | 0         | 0        | 0        | 0         | 0          | 0          | 0           | 0           | 0           | 0          | 0           | 0        | 0           | 0          | 0         | 1          |           |
| rs11649653 | 0           | 0        | 0           | 0           | 1.21796E-05 | 0         | 0           | 0        | 0         | 0         | 0        | 0        | 0         | 0          | 0          | 0           | 0           | 0           | 0          | 0           | 0        | 0           | 0          | 0         | 0          | 1         |
| rs5756931  | 0           | 0        | 0           | 0           | 0           | 0         | 0           | 0        | 0         | 0         | 0        | 0        | 0         | 0          | 0          | 0           | 0           | 0           | 0          | 0           | 0        | 0           | 0          | 0         | 0          | 1         |
