# Supplementary material
Source: PubMed Central journal article supplement (PMC6135234)
Supplement: NIHMS79344-supplement-Supplementary_Material.pdf [file NIHMS79344-supplement-Supplementary_Material.pdf]

## Supplementary Material

### Mendelian randomization implicates hyperlipidaemia as a risk factor for colorectal cancer

Henry Rodriguez-Broadbent<sup>1\*</sup>, Philip J. Law<sup>1\*</sup>, Amit Sud<sup>1\*</sup>, Kimmo Palin<sup>2,3</sup>, Sari Tuupanen<sup>2,3</sup>, Alexandra Gylfe<sup>2,3</sup>, Ulrika A. Hänninen<sup>2,3</sup>, Tatiana Cajuso<sup>2,3</sup>, Tomas Tanskanen<sup>2,3</sup>, Johanna Kondelin<sup>2,3</sup>, Eevi Kaasinen<sup>2,3</sup>, Antti-Pekka Sarin<sup>4</sup>, Johan G. Eriksson<sup>7,8,9</sup>, Harri Rissanen<sup>7</sup>, Paul Knekt<sup>7</sup>, Eero Pukkala<sup>10,11</sup>, Pekka Jousilahti<sup>7</sup>, Veikko Salomaa<sup>7</sup>, Samuli Ripatti<sup>4,5,6</sup>, Aarno Palotie<sup>4,12,13,14</sup>, Laura Renkonen-Sinisalo<sup>15</sup>, Anna Lepistö<sup>15</sup>, Jan Böhm<sup>16</sup>, Jukka-Pekka Mecklin<sup>17</sup>, Nada A. Al-Tassan<sup>18</sup>, Claire Palles<sup>19</sup>, Lynn Martin<sup>19</sup>, Ella Barclay<sup>19</sup>, Susan M. Farrington<sup>20</sup>, Maria N. Timofeeva<sup>20</sup>, Brian F. Meyer<sup>18</sup>, Salma M. Wakil<sup>18</sup>, Harry Campbell<sup>21</sup>, Christopher G. Smith<sup>22</sup>, Shelley Idziaszczyk<sup>22</sup>, Timothy S. Maughan<sup>23</sup>, Richard Kaplan<sup>24</sup>, Rachel Kerr<sup>25</sup>, David Kerr<sup>26</sup>, Michael N. Passarelli<sup>27</sup>, Jane C. Figueiredo<sup>28,29</sup>, Daniel D. Buchanan<sup>30,31</sup>, Aung K. Win<sup>31</sup>, John L. Hopper<sup>31</sup>, Mark A. Jenkins<sup>31</sup>, Noralane M. Lindor<sup>32</sup>, Polly A. Newcomb<sup>33</sup>, Steve Gallinger<sup>34</sup>, David Conti<sup>35</sup>, Fred Schumacher<sup>35</sup>, Graham Casey<sup>36</sup>, Lauri A. Aaltonen<sup>2,3</sup>, Jeremy P. Cheadle<sup>22</sup>, Ian P. Tomlinson<sup>19</sup>, Malcolm G. Dunlop<sup>20</sup>, Richard S. Houlston<sup>1‡</sup>

<sup>1</sup> Division of Genetics and Epidemiology, The Institute of Cancer Research, London, SW7 3RP, UK

<sup>2</sup> Genome-Scale Biology Research Program, Research Programs Unit, University of Helsinki, Helsinki, 00014, Finland

<sup>3</sup> Department of Medical and Clinical Genetics, Medicum, University of Helsinki, Helsinki, 00014, Finland

<sup>4</sup> Institute for Molecular Medicine Finland (FIMM), University of Helsinki, Helsinki, 00014, Finland

<sup>5</sup> Wellcome Trust Sanger Institute, Wellcome Trust Genome Campus, Hinxton, Cambridge CB10 1SA, United Kingdom

<sup>6</sup> Department of Public Health, University of Helsinki, Helsinki, 00014, Finland

<sup>7</sup> National Institute for Health and Welfare, Helsinki, 00271, Finland

<sup>8</sup> Folkhälsan Research Centre, Helsinki, 00250, Finland

<sup>9</sup> Unit of General Practice and Primary Health Care, University of Helsinki and Helsinki University Hospital, Helsinki, 00014, Finland

<sup>10</sup> Finnish Cancer Registry, Institute for Statistical and Epidemiological Cancer Research, Helsinki, 00130, Finland

<sup>11</sup> School of Health Sciences, University of Tampere, Tampere, 33014, Finland

<sup>12</sup> Analytic and Translational Genetics Unit, Department of Medicine, Massachusetts General Hospital, Boston, MA, 02114, USA

<sup>13</sup> Program in Medical and Population Genetics, The Broad Institute of MIT and Harvard, Cambridge, MA, 02142, USA

14 Department of Neurology, Massachusetts General Hospital, Boston, MA, 02114, USA  
15 Abdominal Center, Department of Surgery, Helsinki University Hospital, Helsinki, 00029,  
Finland  
16 Department of Pathology, Central Finland Central Hospital, Jyväskylä, 40620, Finland  
17 Department of Surgery, Jyväskylä Central Hospital, University of Eastern Finland, Jyväskylä,  
40620, Finland  
18 Department of Genetics, King Faisal Specialist Hospital and Research Center, Riyadh, 12713,  
Saudi Arabia  
19 Wellcome Trust Centre for Human Genetics and NIHR Comprehensive Biomedical Research  
Centre, Oxford, OX3 7BN, UK  
20 Colon Cancer Genetics Group, University of Edinburgh and MRC Human Genetics Unit,  
Western General Hospital, Edinburgh, EH4 2XU, UK  
21 Centre for Population Health Sciences, University of Edinburgh, Edinburgh, EH8 9AG, UK  
22 Division of Cancer and Genetics, School of Medicine, Cardiff University, Cardiff, CF14 4XN, UK  
23 CRUK/MRC Oxford Institute for Radiation Oncology, University of Oxford, Oxford, OX3 7DQ,  
UK  
24 MRC Clinical Trials Unit, Aviation House, London, WC2B 6NH, UK  
25 Oxford Cancer Centre, Department of Oncology, University of Oxford, Churchill Hospital,  
Oxford, OX3 7LE, UK  
26 Nuffield Department of Clinical Laboratory Sciences, University of Oxford, John Radcliffe  
Hospital, Oxford, OX3 9DU, UK  
27 Department of Epidemiology, Geisel School of Medicine at Dartmouth, Dartmouth-Hitchcock  
Medical Center, Lebanon, NH, 03756, USA  
28 Samuel Oschin Comprehensive Cancer Center, Cedars-Sinai Medical Center, Los Angeles CA,  
USA  
29 Keck School of Medicine, University of Southern California, Los Angeles, CA, USA  
30 Colorectal Oncogenomics Group, Genetic Epidemiology Laboratory, Department of  
Pathology, The University of Melbourne, Victoria, 3010, Australia  
31 Centre for Epidemiology and Biostatistics, The University of Melbourne, Victoria, 3010,  
Australia  
32 Department of Health Sciences Research, Mayo Clinic, Scottsdale, AZ, 85259, USA  
33 Cancer Prevention Program, Fred Hutchinson Cancer Research Center, Seattle, WA, 98109,  
USA  
34 Lunenfeld-Tanenbaum Research Institute, Mount Sinai Hospital, Toronto, ON, M5G 1X5,  
Canada  
35 Department of Preventive Medicine, University of Southern California, Los Angeles, CA,  
90033, USA  
36 Center for Public Health Genomics, University of Virginia, Charlottesville, VA, 22908, USA

**Supplementary Figure 1: SNP-specific effects for risk of colorectal cancer.** For each figure, the effect size of the respective measure for total cholesterol (TC), triglyceride (TG), low density lipoprotein (LDL), high density lipoprotein (HDL), is plotted against the effect of colorectal cancer (CRC). Each point represents a SNP that was found to be associated with the trait effect. Lipid trait data obtained from the Global Lipids Genetics Consortium (GLGC) (Willer CJ, *et al.* Nat Genet 2013, doi: 10.1038/ng.2797).

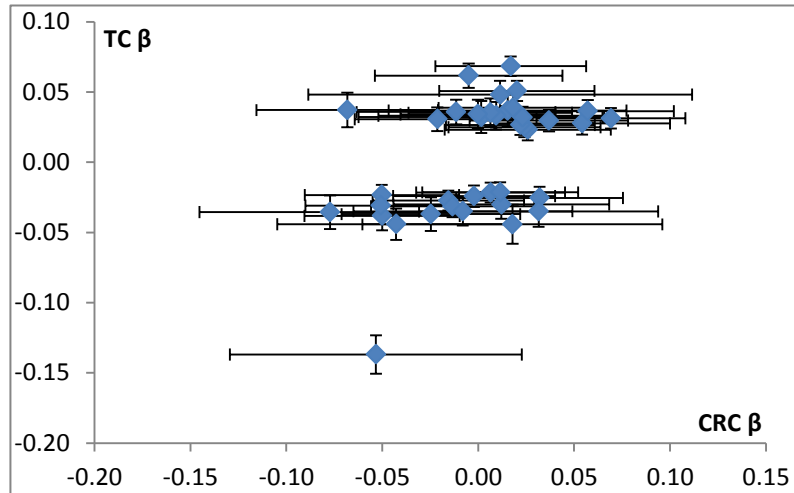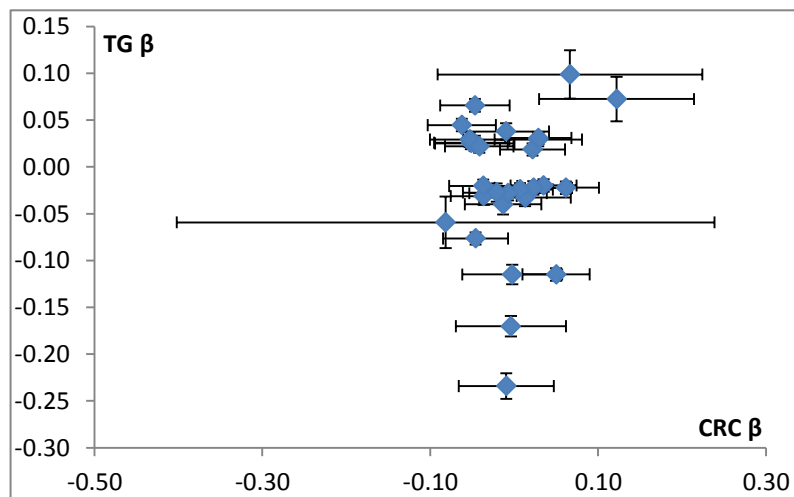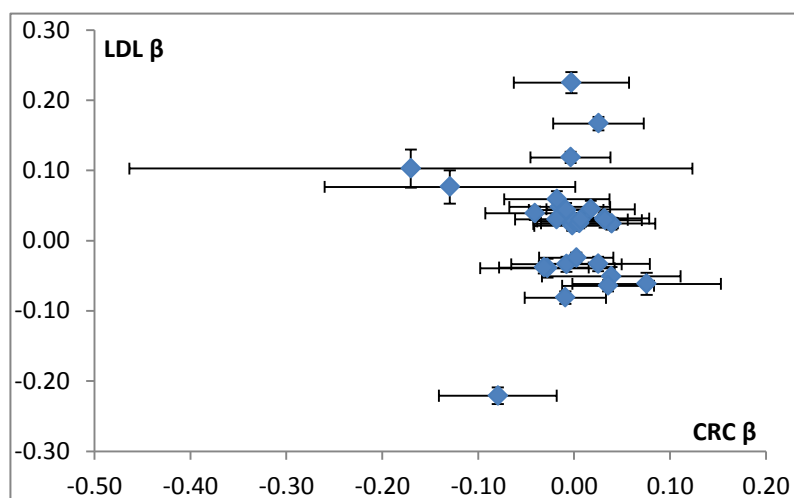

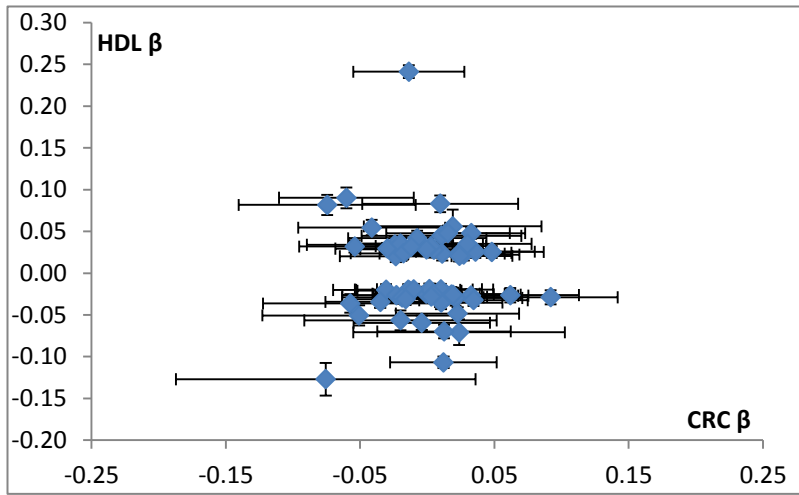

**Supplementary Figure 2: Meta-analysis OR for colorectal cancer per unit increase in genetic risk score, using the restricted SNP list for low density lipoprotein (LDL), high density lipoprotein (HDL) and triglyceride (TG).** Horizontal lines: 95% CIs. Box: OR point estimate; its area is proportional to the weight of the study. Diamond: overall summary estimate, with confidence interval given by its width. Vertical line: null value (OR = 1.0).

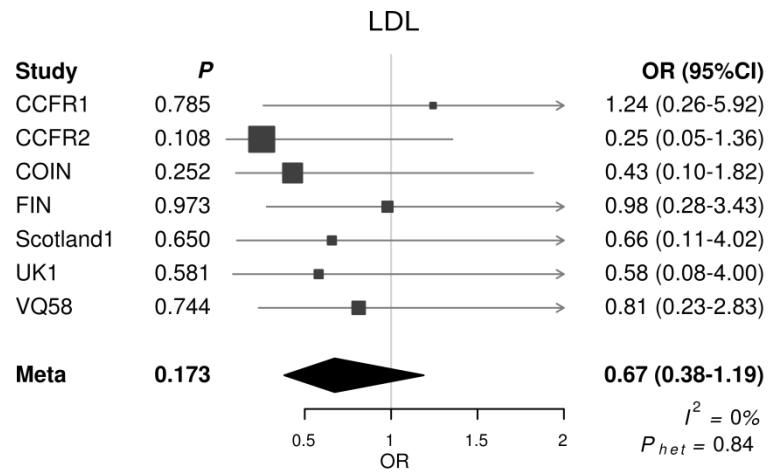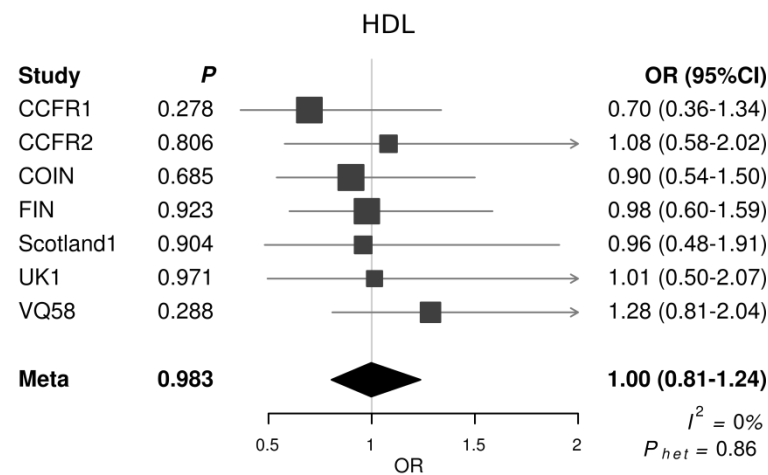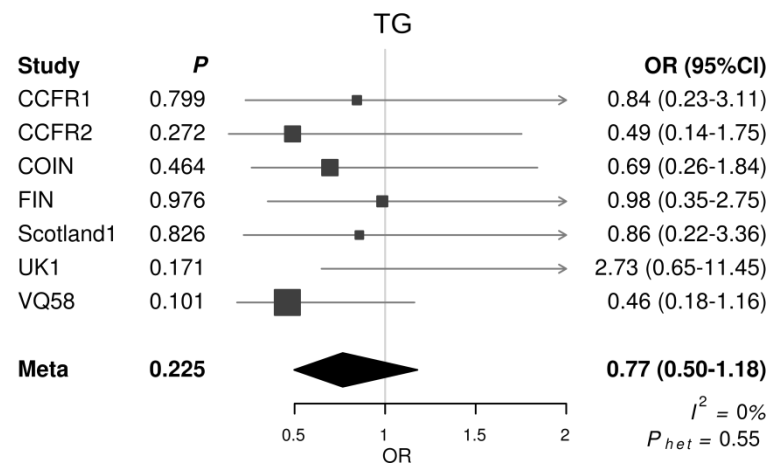

**Supplementary Table 1: Median and range of standard deviations of lipid trait measurements in European cohorts of the Global Lipids Genetics Consortium from which genetic instruments were derived.** Data obtained from Willer CJ, *et al.* Nat Genet 2013, doi: 10.1038/ng.2797.

|              | HDL (mg/dL) | LDL (mg/dL) | TC (mg/dL)  | TG (mg/dL)   |
|--------------|-------------|-------------|-------------|--------------|
| Median of SD | 14.8        | 36.2        | 42.5        | 89.5         |
| (range)      | (10.7-28.3) | (22.4-78.6) | (30.2-59.9) | (36.3-176.4) |

**Supplementary Table 2: Effect size and standard error for each measure for blood lipids and CRC risk for SNPs used as instrumental variables.**

**(a) Total cholesterol (TC)**

| SNP ID     | TC $\beta$ | TC SE  | CRC $\beta$ | CRC SE   | SNP ID     | TC $\beta$ | TC SE  | CRC $\beta$ | CRC SE   |
|------------|------------|--------|-------------|----------|------------|------------|--------|-------------|----------|
| rs1077514  | -0.0301    | 0.0052 | 0.01209     | 0.028716 | rs7570971  | 0.0297     | 0.0039 | 0.036884    | 0.021067 |
| rs2287623  | -0.0273    | 0.0036 | -0.01554    | 0.020127 | rs2290159  | -0.0369    | 0.0061 | -0.02465    | 0.023742 |
| rs11694172 | 0.0277     | 0.0041 | 0.054226    | 0.023352 | rs12916    | 0.0684     | 0.0036 | 0.016941    | 0.020029 |
| rs11563251 | 0.0368     | 0.0059 | 0.015338    | 0.031614 | rs6882076  | 0.0508     | 0.0037 | 0.0202      | 0.020648 |
| rs13315871 | -0.0355    | 0.0061 | -0.07722    | 0.034769 | rs3177928  | 0.0482     | 0.005  | 0.01143     | 0.051042 |
| rs2758886  | 0.0232     | 0.0039 | 0.025796    | 0.022094 | rs2814982  | -0.0441    | 0.0057 | -0.04276    | 0.031595 |
| rs9376090  | -0.0254    | 0.004  | 0.032015    | 0.022201 | rs9488822  | 0.0341     | 0.0053 | -0.00012    | 0.020622 |
| rs1997243  | 0.0332     | 0.005  | 0.00933     | 0.031257 | rs12670798 | 0.0364     | 0.0041 | 0.057099    | 0.022941 |
| rs3780181  | -0.0442    | 0.0071 | 0.017876    | 0.039889 | rs2072183  | 0.0358     | 0.0045 | -0.01149    | 0.026442 |
| rs10904908 | 0.025      | 0.0036 | 0.0241      | 0.020227 | rs2081687  | -0.0382    | 0.0052 | -0.05009    | 0.020629 |
| rs11603023 | -0.0216    | 0.0036 | 0.006481    | 0.019819 | rs2255141  | -0.0314    | 0.0039 | -0.01331    | 0.021688 |
| rs4883201  | -0.035     | 0.0056 | 0.031514    | 0.031799 | rs10128711 | 0.0307     | 0.0043 | -0.02127    | 0.021978 |
| rs314253   | -0.0233    | 0.0037 | -0.05024    | 0.020508 | rs11065987 | -0.0309    | 0.0036 | -0.05071    | 0.020079 |
| rs138777   | -0.0214    | 0.0037 | 0.011402    | 0.02073  | rs1169288  | 0.0318     | 0.0039 | 0.023109    | 0.021263 |
| rs4253772  | 0.0322     | 0.0058 | 0.001592    | 0.032643 | rs2000999  | 0.0617     | 0.0044 | -0.00497    | 0.024956 |
| rs12027135 | 0.0266     | 0.0036 | 0.022066    | 0.019795 | rs10401969 | -0.1369    | 0.007  | -0.0533     | 0.038833 |
| rs7515577  | 0.0372     | 0.0063 | -0.06823    | 0.024144 | rs492602   | 0.0313     | 0.0037 | 0.06922     | 0.019809 |
| rs2642442  | 0.0353     | 0.0052 | 0.006334    | 0.02176  | rs2277862  | -0.0349    | 0.0052 | -0.008      | 0.029111 |
| rs514230   | 0.0388     | 0.0053 | 0.018197    | 0.019782 | rs2902940  | -0.0241    | 0.0039 | -0.00217    | 0.021552 |

**(b) Triglyceride (TG)**

| SNP ID    | TG $\beta$ | TG SE   | CRC $\beta$ | CRC SE   | SNP ID     | TG $\beta$ | TG SE  | CRC $\beta$ | CRC SE   |
|-----------|------------|---------|-------------|----------|------------|------------|--------|-------------|----------|
| rs6831256 | 0.0258     | 0.0035  | -0.05147    | 0.022375 | rs17145738 | -0.1149    | 0.0053 | -0.00234    | 0.030283 |
| rs998584  | 0.0293     | 0.0037  | 0.028818    | 0.026524 | rs11776767 | 0.022      | 0.0035 | -0.04156    | 0.020802 |
| rs38855   | 0.0187     | -0.0033 | 0.021875    | 0.019777 | rs1495741  | -0.0399    | 0.0056 | -0.01322    | 0.023308 |
| rs1832007 | -0.0327    | 0.0047  | 0.013001    | 0.02786  | rs12678919 | -0.1702    | 0.0056 | -0.00389    | 0.033468 |
| rs3198697 | -0.0198    | 0.0034  | 0.03502     | 0.019973 | rs2954029  | -0.0764    | 0.0033 | -0.04592    | 0.019766 |
| rs8077889 | 0.0252     | 0.0042  | -0.04698    | 0.024063 | rs10761731 | -0.0312    | 0.0047 | -0.03631    | 0.019982 |
| rs7248104 | -0.0222    | 0.0034  | 0.061516    | 0.020096 | rs2068888  | -0.0241    | 0.0034 | 0.007017    | 0.01987  |
| rs731839  | -0.0224    | 0.0036  | 0.022942    | 0.023526 | rs174546   | 0.0447     | 0.0034 | -0.06247    | 0.020693 |
| rs2131925 | 0.0657     | 0.0035  | -0.04681    | 0.021047 | rs964184   | -0.2341    | 0.0069 | -0.00946    | 0.028865 |
| rs1260326 | -0.1148    | 0.0034  | 0.050007    | 0.020408 | rs11613352 | -0.028     | 0.0039 | -0.00728    | 0.02345  |
| rs645040  | 0.0293     | 0.004   | -0.05304    | 0.024076 | rs2412710  | 0.0988     | 0.0132 | 0.06647     | 0.080463 |
| rs442177  | 0.0309     | 0.0033  | 0.028915    | 0.020135 | rs11649653 | -0.0274    | 0.005  | -0.02074    | 0.020645 |
| rs9686661 | 0.0379     | 0.0044  | -0.0096     | 0.026116 | rs5756931  | -0.0203    | 0.0035 | -0.03693    | 0.020723 |

**(c) Low Density Lipoprotein (LDL)**

| SNP ID     | LDL $\beta$ | LDL SE | CRC $\beta$ | CRC SE   | SNP ID     | LDL $\beta$ | LDL SE | CRC $\beta$ | CRC SE   |
|------------|-------------|--------|-------------|----------|------------|-------------|--------|-------------|----------|
| rs267733   | -0.0331     | 0.0053 | 0.025045    | 0.027557 | rs2479409  | -0.0642     | 0.0041 | 0.035458    | 0.024391 |
| rs2710642  | 0.0239      | 0.0038 | -0.00191    | 0.020767 | rs629301   | 0.1669      | 0.0049 | 0.025453    | 0.024105 |
| rs10490626 | -0.0508     | 0.0069 | 0.038907    | 0.036863 | rs1367117  | 0.1186      | 0.004  | -0.00367    | 0.021263 |
| rs2030746  | 0.0214      | 0.0038 | -0.0019     | 0.020167 | rs4299376  | -0.0812     | 0.0045 | -0.00916    | 0.021638 |
| rs1250229  | 0.0243      | 0.0042 | 0.03899     | 0.023305 | rs3757354  | -0.0382     | 0.0044 | -0.03148    | 0.023902 |
| rs7640978  | -0.0392     | 0.0069 | -0.0279     | 0.03577  | rs1800562  | -0.0615     | 0.008  | 0.075604    | 0.039531 |
| rs17404153 | -0.0336     | 0.0054 | -0.00794    | 0.029441 | rs1564348  | 0.0481      | 0.005  | -0.01494    | 0.026778 |
| rs4530754  | 0.0275      | 0.0036 | 1.05E-05    | 0.019691 | rs11136341 | 0.0447      | 0.0062 | 0.017329    | 0.023505 |
| rs4722551  | 0.0391      | 0.0049 | -0.04085    | 0.026366 | rs11220462 | 0.059       | 0.0059 | -0.01805    | 0.028013 |
| rs10102164 | 0.0316      | 0.0045 | 0.031518    | 0.023917 | rs8017377  | 0.0303      | 0.0038 | -0.01824    | 0.022132 |
| rs4942486  | -0.0243     | 0.0037 | 0.002276    | 0.019768 | rs7206971  | 0.0292      | 0.0055 | 0.031978    | 0.019796 |
| rs1801689  | 0.1028      | 0.0139 | -0.17021    | 0.149789 | rs6511720  | -0.2209     | 0.0061 | -0.07952    | 0.031259 |
| rs364585   | 0.0249      | 0.0038 | 0.005459    | 0.020436 | rs4420638  | 0.2251      | 0.0077 | -0.00282    | 0.030684 |
| rs2328223  | 0.0299      | 0.005  | 0.006866    | 0.025082 | rs6029526  | 0.0436      | 0.0052 | -0.00828    | 0.019841 |
| rs5763662  | 0.0767      | 0.0121 | -0.12953    | 0.066657 |            |             |        |             |          |

**(d) High Density Lipoprotein (HDL)**

| SNP ID     | HDL $\beta$ | HDL SE | CRC $\beta$ | CRC SE   | SNP ID     | HDL $\beta$ | HDL SE | CRC $\beta$ | CRC SE   |
|------------|-------------|--------|-------------|----------|------------|-------------|--------|-------------|----------|
| rs12748152 | -0.0506     | 0.0062 | -0.05079    | 0.036697 | rs6450176  | -0.0254     | 0.0039 | 0.004788    | 0.022856 |
| rs12145743 | 0.0203      | 0.0036 | -0.02339    | 0.02124  | rs605066   | 0.0281      | 0.0049 | 0.005003    | 0.020148 |
| rs4650994  | -0.021      | 0.0034 | -0.01312    | 0.01977  | rs4731702  | 0.0294      | 0.0034 | -0.02976    | 0.019758 |
| rs1047891  | -0.0269     | 0.0039 | 0.032468    | 0.021828 | rs9987289  | 0.0817      | 0.0062 | -0.07449    | 0.033657 |
| rs2606736  | -0.0246     | 0.0043 | -0.00083    | 0.020414 | rs2293889  | -0.0312     | 0.0035 | -0.01604    | 0.020209 |
| rs2290547  | -0.0297     | 0.0046 | 0.0211      | 0.025386 | rs581080   | 0.0419      | 0.0045 | -0.00744    | 0.026288 |
| rs2013208  | 0.0254      | 0.0036 | 0.048114    | 0.01973  | rs1883025  | -0.0698     | 0.0041 | 0.012553    | 0.025375 |
| rs13326165 | -0.0289     | 0.0043 | 0.091868    | 0.025455 | rs2923084  | -0.0256     | 0.0045 | 0.018078    | 0.026258 |
| rs6805251  | -0.02       | 0.0035 | -0.03059    | 0.020186 | rs3136441  | 0.0545      | 0.0047 | -0.04138    | 0.0279   |
| rs10019888 | -0.027      | 0.0046 | 0.01505     | 0.026872 | rs7134375  | 0.0207      | 0.0035 | 0.023898    | 0.020136 |
| rs3822072  | -0.0251     | 0.0034 | 0.014044    | 0.022235 | rs7134594  | 0.0354      | 0.0048 | -0.01978    | 0.01973  |
| rs2602836  | -0.0192     | 0.0034 | 0.001673    | 0.019974 | rs4759375  | 0.056       | 0.0102 | 0.019022    | 0.033759 |
| rs1936800  | -0.02       | 0.0034 | -0.01417    | 0.019779 | rs4765127  | 0.0324      | 0.005  | 0.00276     | 0.020981 |
| rs702485   | 0.0243      | 0.0034 | 0.023978    | 0.019807 | rs838880   | -0.0484     | 0.0039 | 0.022615    | 0.023429 |
| rs4142995  | -0.0263     | 0.0037 | -0.02289    | 0.020512 | rs1532085  | -0.1068     | 0.0035 | 0.012131    | 0.020267 |
| rs4917014  | 0.0222      | 0.0036 | 0.027166    | 0.021148 | rs2652834  | 0.0285      | 0.0043 | -0.0006     | 0.025061 |
| rs17173637 | -0.0363     | 0.0057 | -0.05727    | 0.033185 | rs3764261  | 0.2412      | 0.0039 | -0.01363    | 0.021083 |
| rs970548   | 0.0258      | 0.0039 | 0.035886    | 0.022568 | rs16942887 | 0.0831      | 0.0051 | 0.009637    | 0.029645 |
| rs12801636 | 0.0235      | 0.0042 | 0.011193    | 0.023759 | rs2925979  | 0.0351      | 0.0037 | 0.029883    | 0.024405 |
| rs499974   | -0.0263     | 0.0044 | 0.061846    | 0.026051 | rs11869286 | 0.0319      | 0.0037 | -0.05404    | 0.021108 |
| rs4983559  | -0.0197     | 0.0036 | -0.01004    | 0.022409 | rs4148008  | -0.028      | 0.0038 | 0.00307     | 0.021227 |
| rs1121980  | -0.0196     | 0.0034 | 0.010172    | 0.019927 | rs4129767  | 0.0237      | 0.0034 | -0.01774    | 0.019943 |
| rs17695224 | -0.029      | 0.0039 | -0.01857    | 0.022818 | rs7241918  | 0.0902      | 0.0064 | -0.0601     | 0.025622 |
| rs4660293  | -0.0353     | 0.004  | 0.01031     | 0.023392 | rs12967135 | -0.0262     | 0.0045 | 0.019321    | 0.023572 |
| rs1689800  | -0.0344     | 0.0036 | -0.035      | 0.020788 | rs7255436  | 0.0316      | 0.0053 | -0.01196    | 0.022159 |
| rs4846914  | 0.0479      | 0.0034 | 0.03285     | 0.020435 | rs737337   | -0.0565     | 0.0061 | -0.01983    | 0.036536 |



|            |         |        |          |          |           |         |        |          |          |
|------------|---------|--------|----------|----------|-----------|---------|--------|----------|----------|
| rs12328675 | 0.0447  | 0.0052 | 0.010666 | 0.030301 | rs386000  | 0.0479  | 0.0047 | 0.015518 | 0.023475 |
| rs2972146  | -0.0323 | 0.0035 | 0.034505 | 0.020641 | rs1800961 | -0.127  | 0.0099 | -0.07554 | 0.056898 |
| rs13107325 | -0.0708 | 0.0078 | 0.023783 | 0.040182 | rs6065906 | -0.0594 | 0.0044 | -0.00408 | 0.025891 |

**Supplementary Table 3: SNP lists used in the restricted analysis for HDL, LDL, and TG, as *per Holmes et al* (Eur Heart J 2015, doi: 10.1093/eurheartj/eh571).**

**(a) HDL**

|            |            |            |            |           |
|------------|------------|------------|------------|-----------|
| rs12145743 | rs2602836  | rs1689800  | rs7134594  | rs7255436 |
| rs4650994  | rs702485   | rs12328675 | rs4759375  | rs737337  |
| rs1047891  | rs4142995  | rs13107325 | rs838880   | rs386000  |
| rs2606736  | rs4917014  | rs6450176  | rs2652834  |           |
| rs2290547  | rs17173637 | rs605066   | rs16942887 |           |
| rs2013208  | rs12801636 | rs4731702  | rs2925979  |           |
| rs13326165 | rs499974   | rs2293889  | rs11869286 |           |
| rs6805251  | rs4983559  | rs2923084  | rs4148008  |           |
| rs10019888 | rs17695224 | rs3136441  | rs4129767  |           |
| rs3822072  | rs4660293  | rs7134375  | rs12967135 |           |

**(b) LDL**

|           |           |
|-----------|-----------|
| rs267733  | rs364585  |
| rs2710642 | rs2328223 |
| rs1250229 | rs5763662 |
| rs4942486 | rs8017377 |
| rs1801689 |           |

**(c) TG**

|           |            |
|-----------|------------|
| rs38855   | rs9686661  |
| rs1832007 | rs11776767 |
| rs3198697 | rs10761731 |
| rs8077889 | rs2068888  |
| rs7248104 | rs2412710  |
| rs645040  | rs11649653 |
| rs442177  | rs5756931  |

**Supplementary Data: Pairwise R<sup>2</sup> calculations for the SNPs used as instrumental variables.**

*Separate file*
